# Supplementary material for: Effect of Nitrogen Nutrition and Planting Date on the Yield and Physicochemical Parameters of Flowering Chinese Cabbage
Source: MDPI journal article supplement (doi:10.3390/agronomy12112869), 2022-11-16
Supplement: s1 [file s1]

# Effect of Nitrogen Nutrition and Planting Date on the Yield and Physicochemical Parameters of Flowering Chinese Cabbage

Wenping Liu <sup>1</sup>, Małgorzata Muzolf-Panek <sup>2</sup> and Tomasz Kleiber <sup>1,\*</sup>

<sup>1</sup> Laboratory of Plant Nutrition, Department of Plant Physiology, Faculty of Agronomy, Horticulture and Bioengineering, Poznan University of Life Sciences, Zgorzelecka 4, 60-198 Poznan, Poland

<sup>2</sup> Department of Food Quality and Safety Management, Poznan University of Life Sciences, 60-624 Poznan, Poland

\* Correspondence: tkleiber@up.poznan.pl

## Supplementary Materials

**Table S1.** SD values for content of N, P, K, Ca and Mg in leaves (% in d.m.).

| N level    | N      |        | P      |        | K      |        | Ca     |        | Mg     |        |
|------------|--------|--------|--------|--------|--------|--------|--------|--------|--------|--------|
|            | Spring | Autumn |
| Substrate  |        |        |        |        |        |        |        |        |        |        |
| N-50       | 0.310  | 0.229  | 0.026  | 0.021  | 0.026  | 0.297  | 0.252  | 0.433  | 0.252  | 0.033  |
| N-70       | 0.319  | 0.125  | 0.037  | 0.057  | 0.037  | 0.412  | 0.333  | 0.156  | 0.333  | 0.037  |
| N-90       | 0.398  | 0.200  | 0.053  | 0.048  | 0.053  | 0.385  | 0.124  | 0.253  | 0.124  | 0.023  |
| N-110      | 0.144  | 0.511  | 0.042  | 0.041  | 0.042  | 0.515  | 0.198  | 0.240  | 0.198  | 0.041  |
| N-130      | 0.111  | 0.322  | 0.020  | 0.032  | 0.020  | 0.318  | 0.308  | 0.227  | 0.308  | 0.029  |
| Hydroponic |        |        |        |        |        |        |        |        |        |        |
| N-50       | 0.231  | 0.144  | 0.025  | 0.017  | 0.025  | 0.359  | 0.127  | 0.181  | 0.127  | 0.045  |
| N-70       | 0.400  | 0.066  | 0.010  | 0.018  | 0.010  | 0.529  | 0.234  | 0.295  | 0.234  | 0.055  |
| N-90       | 0.151  | 0.144  | 0.043  | 0.008  | 0.043  | 0.762  | 0.139  | 0.315  | 0.139  | 0.081  |
| N-110      | 0.401  | 0.087  | 0.029  | 0.040  | 0.029  | 0.398  | 0.102  | 0.130  | 0.102  | 0.083  |
| N-130      | 0.644  | 0.087  | 0.024  | 0.033  | 0.024  | 0.578  | 0.429  | 0.166  | 0.429  | 0.036  |

**Table S2.** SD values for content of Fe, Zn, Mn, Cu (in mg·kg<sup>-1</sup> d.m.) and Na (% in d.m.) in leaves.

| N level    | Fe     |        | Zn     |        | Mn     |        | Cu     |        | Na     |        |
|------------|--------|--------|--------|--------|--------|--------|--------|--------|--------|--------|
|            | Spring | Autumn |
| Substrate  |        |        |        |        |        |        |        |        |        |        |
| N-50       | 22.557 | 17.414 | 5.662  | 7.379  | 7.165  | 9.260  | 1.798  | 1.212  | 0.020  | 0.025  |
| N-70       | 20.314 | 28.508 | 1.809  | 3.207  | 1.426  | 2.601  | 1.889  | 0.304  | 0.028  | 0.017  |
| N-90       | 16.142 | 3.719  | 6.164  | 4.001  | 4.355  | 4.596  | 0.459  | 0.480  | 0.016  | 0.033  |
| N-110      | 4.564  | 22.521 | 4.687  | 5.699  | 3.368  | 3.672  | 1.621  | 0.632  | 0.038  | 0.042  |
| N-130      | 21.781 | 32.274 | 2.684  | 2.046  | 2.580  | 3.411  | 0.493  | 0.411  | 0.041  | 0.052  |
| Hydroponic |        |        |        |        |        |        |        |        |        |        |
| N-50       | 4.153  | 7.753  | 0.270  | 0.040  | 4.759  | 2.876  | 0.243  | 0.258  | 0.012  | 0.037  |
| N-70       | 5.092  | 9.655  | 1.537  | 0.381  | 5.057  | 2.485  | 0.242  | 0.497  | 0.005  | 0.008  |
| N-90       | 2.568  | 10.272 | 4.650  | 0.730  | 2.655  | 3.728  | 0.223  | 0.136  | 0.024  | 0.023  |
| N-110      | 4.857  | 3.735  | 3.137  | 1.669  | 2.372  | 3.855  | 0.160  | 0.129  | 0.017  | 0.006  |
| N-130      | 9.930  | 8.507  | 3.160  | 2.374  | 5.888  | 9.512  | 0.572  | 0.324  | 0.018  | 0.019  |

**Table S3.** SD values for color parameters.

| N level    | L* (D65) |        | a* (D65) green |        | b* (D65) yellow |        | h* [°](D65) |        | C*     |        |
|------------|----------|--------|----------------|--------|-----------------|--------|-------------|--------|--------|--------|
|            | Spring   | Autumn | Spring         | Autumn | Spring          | Autumn | Spring      | Autumn | Spring | Autumn |
| Substrate  |          |        |                |        |                 |        |             |        |        |        |
| N-50       | 0.006    | 0.010  | 0.006          | 0.010  | 0.012           | 0.015  | 0.015       | 0.020  | 0.010  | 0.017  |
| N-70       | 0.006    | 0.000  | 0.006          | 0.006  | 0.015           | 0.010  | 0.012       | 0.023  | 0.014  | 0.008  |
| N-90       | 0.000    | 0.006  | 0.006          | 0.006  | 0.020           | 0.015  | 0.006       | 0.026  | 0.020  | 0.012  |
| N-110      | 0.006    | 0.006  | 0.006          | 0.012  | 0.015           | 0.012  | 0.010       | 0.015  | 0.014  | 0.015  |
| N-130      | 0.032    | 0.006  | 0.006          | 0.006  | 0.015           | 0.012  | 0.010       | 0.006  | 0.016  | 0.013  |
| Hydroponic |          |        |                |        |                 |        |             |        |        |        |
| N-50       | 0.006    | 0.006  | 0.006          | 0.000  | 0.012           | 0.006  | 0.025       | 0.006  | 0.012  | 0.005  |
| N-70       | 0.006    | 0.000  | 0.006          | 0.006  | 0.017           | 0.015  | 0.031       | 0.020  | 0.014  | 0.014  |
| N-90       | 0.000    | 0.000  | 0.020          | 0.006  | 0.012           | 0.006  | 0.040       | 0.020  | 0.018  | 0.007  |
| N-110      | 0.010    | 0.006  | 0.017          | 0.006  | 0.012           | 0.010  | 0.023       | 0.010  | 0.017  | 0.011  |
| N-130      | 0.006    | 0.010  | 0.012          | 0.006  | 0.012           | 0.006  | 0.035       | 0.029  | 0.006  | 0.005  |

**Table S4.** SD values for chlorophylls and carotenoids.

| N level    | Chl a<br>(mg/g DW) |        | Chl b<br>(mg/g DW) |        | Carotenoid (x+c)<br>(mg/g DW) |        | Chl a+Chl b<br>(mg/g DW) |        | Chl a/Chl b |        | (Chl a+Chl b)/(x+c) |        |
|------------|--------------------|--------|--------------------|--------|-------------------------------|--------|--------------------------|--------|-------------|--------|---------------------|--------|
|            | Spring             | Autumn | Spring             | Autumn | Spring                        | Autumn | Spring                   | Autumn | Spring      | Autumn | Spring              | Autumn |
| Substrate  |                    |        |                    |        |                               |        |                          |        |             |        |                     |        |
| N-50       | 1.027              | 0.900  | 0.505              | 0.501  | 0.184                         | 0.201  | 1.529                    | 1.335  | 0.755       | 0.805  | 0.646               | 0.884  |
| N-70       | 0.625              | 0.200  | 0.215              | 0.066  | 0.155                         | 0.086  | 0.835                    | 0.261  | 0.129       | 0.063  | 0.099               | 0.314  |
| N-90       | 0.486              | 0.387  | 0.101              | 0.116  | 0.278                         | 0.059  | 0.571                    | 0.490  | 0.131       | 0.119  | 0.736               | 0.267  |
| N-110      | 0.550              | 0.797  | 0.228              | 0.350  | 0.139                         | 0.186  | 0.773                    | 1.034  | 0.183       | 0.779  | 0.234               | 1.010  |
| N-130      | 1.092              | 0.158  | 0.073              | 0.227  | 0.309                         | 0.149  | 1.133                    | 0.214  | 0.424       | 0.787  | 0.278               | 0.927  |
| Hydroponic |                    |        |                    |        |                               |        |                          |        |             |        |                     |        |
| N-50       | 0.947              | 0.305  | 0.300              | 0.149  | 0.281                         | 0.055  | 1.247                    | 0.399  | 0.104       | 0.319  | 0.287               | 0.068  |
| N-70       | 0.229              | 0.478  | 0.066              | 0.308  | 0.055                         | 0.131  | 0.274                    | 0.611  | 0.099       | 0.895  | 0.019               | 0.668  |
| N-90       | 1.054              | 0.246  | 0.146              | 0.153  | 0.288                         | 0.063  | 1.199                    | 0.399  | 0.217       | 0.208  | 0.297               | 0.013  |
| N-110      | 0.618              | 0.558  | 0.325              | 0.425  | 0.159                         | 0.036  | 0.939                    | 0.981  | 0.254       | 0.735  | 0.092               | 0.847  |
| N-130      | 0.878              | 0.724  | 0.091              | 0.335  | 0.098                         | 0.203  | 0.879                    | 0.918  | 0.390       | 0.852  | 0.361               | 0.706  |

**Table S5.** SD values for phenolic content and the antioxidant activity.

| N level    | TEAC<br>( $\mu\text{mol/g}$ ) |        | DPPH<br>( $\mu\text{mol TE/g}$ ) |        | FRAP<br>( $\text{mmol TE/g}$ ) |        | TPC<br>( $\text{mg GAE/g}$ ) |        | TFC<br>( $\text{mg QE/g}$ ) |        |
|------------|-------------------------------|--------|----------------------------------|--------|--------------------------------|--------|------------------------------|--------|-----------------------------|--------|
|            | Spring                        | Autumn | Spring                           | Autumn | Spring                         | Autumn | Spring                       | Autumn | Spring                      | Autumn |
| Substrate  |                               |        |                                  |        |                                |        |                              |        |                             |        |
| N-50       | 6.086                         | 8.381  | 17.202                           | 8.695  | 1.598                          | 1.625  | 0.494                        | 0.668  | 0.381                       | 0.048  |
| N-70       | 18.399                        | 4.493  | 5.322                            | 3.281  | 2.399                          | 0.226  | 0.841                        | 0.050  | 0.306                       | 0.025  |
| N-90       | 10.234                        | 13.221 | 6.880                            | 10.475 | 0.618                          | 1.206  | 1.047                        | 0.741  | 0.360                       | 0.128  |
| N-110      | 10.234                        | 12.574 | 22.838                           | 6.941  | 3.378                          | 2.229  | 0.470                        | 0.041  | 0.142                       | 0.030  |
| N-130      | 2.703                         | 10.981 | 5.493                            | 8.695  | 1.409                          | 1.016  | 0.488                        | 0.678  | 0.355                       | 0.210  |
| Hydroponic |                               |        |                                  |        |                                |        |                              |        |                             |        |
| N-50       | 53.176                        | 25.312 | 2.743                            | 0.857  | 7.680                          | 0.016  | 1.298                        | 0.371  | 0.198                       | 0.046  |
| N-70       | 25.998                        | 32.031 | 0.000                            | 9.031  | 0.152                          | 1.004  | 0.381                        | 0.720  | 0.147                       | 0.123  |
| N-90       | 29.251                        | 9.524  | 12.668                           | 2.250  | 4.864                          | 1.622  | 0.249                        | 0.394  | 0.199                       | 0.108  |
| N-110      | 16.729                        | 7.797  | 10.621                           | 14.267 | 2.192                          | 1.747  | 0.295                        | 0.567  | 0.135                       | 0.059  |
| N-130      | 31.562                        | 21.355 | 5.485                            | 3.577  | 5.929                          | 2.372  | 0.191                        | 0.526  | 0.271                       | 0.142  |

**Table S6.** r-Pearson's coefficients for the correlation between variables for substrate samples (as an average over season). L\*—lightness, a\*, b\*—colour chromatic coordinates, h\*—hue angle, C\*—chroma.

| Variables            | N | P     | K     | Ca     | Mg     | Na     | Fe     | Zn     | Mn     | Cu     | TEAC   | DPPH   | FRAP   | TPC    | TFC    | L* (D65) | a* (D65) | b* (D65) | C*     | h* (D65) | Chl a  | Chl b  | Carot-enoids (x+c) | Chl a+ Chl b | Chl a/ Chl b | (Chl a+ Chl b)/ (x+c) |
|----------------------|---|-------|-------|--------|--------|--------|--------|--------|--------|--------|--------|--------|--------|--------|--------|----------|----------|----------|--------|----------|--------|--------|--------------------|--------------|--------------|-----------------------|
| N                    | 1 | .1568 | .8453 | .6203  | -.7319 | .7821  | .4389  | .2036  | .6565  | -.5216 | .3937  | -.4705 | -.5357 | -.4661 | -.7019 | .1622    | .4090    | -.8049   | -.7931 | .2411    | -.2478 | -.1761 | -.4228             | -.2371       | -.1521       | .6132                 |
| P                    |   | 1     | .2566 | -.1058 | .1179  | -.1448 | -.1191 | .1023  | -.0082 | -.0511 | -.3353 | .0733  | .0994  | -.0029 | .1106  | -.5526   | .3343    | .0281    | -.0373 | -.3993   | .1965  | .1773  | .2108              | .1960        | .0980        | -.1324                |
| K                    |   |       | 1     | .4816  | -.8460 | .7015  | .2768  | -.1848 | .4814  | -.7089 | .0652  | -.7011 | -.7738 | -.7527 | -.7335 | .2195    | .6643    | -.7483   | -.7905 | -.0816   | -.5261 | -.4213 | -.6395             | -.5133       | -.1886       | .5780                 |
| Ca                   |   |       |       | 1      | -.3404 | .6441  | .4098  | .1147  | .5181  | -.3132 | .5046  | -.3811 | -.3960 | -.3726 | -.4900 | .4278    | .0003    | -.5032   | -.4480 | .4434    | -.1762 | -.0571 | -.2971             | -.1541       | -.2417       | .4695                 |
| Mg                   |   |       |       |        | 1      | -.6672 | -.2483 | .2599  | -.3738 | .6928  | -.1327 | .7847  | .8728  | .7708  | .7693  | -.4159   | -.5615   | .7422    | .7653  | -.0326   | .6976  | .6115  | .8039              | .6919        | .1644        | -.6141                |
| Na                   |   |       |       |        |        | 1      | .3930  | .0732  | .5744  | -.4179 | .4962  | -.4553 | -.5365 | -.4683 | -.6064 | .2960    | .2650    | -.7851   | -.7486 | .3906    | -.3073 | -.2082 | -.4676             | -.2918       | -.2246       | .6165                 |
| Fe                   |   |       |       |        |        |        | 1      | .2681  | .3176  | -.1737 | .3628  | -.2690 | -.2600 | -.1516 | -.3426 | .0088    | .2792    | -.3936   | -.4061 | .0273    | -.1696 | -.1942 | -.2379             | -.1778       | .0489        | .2356                 |
| Zn                   |   |       |       |        |        |        |        | 1      | .4175  | .2837  | .4798  | .4266  | .4298  | .4694  | .1877  | -.3614   | -.2657   | .0049    | .0531  | .2635    | .5200  | .4760  | .4203              | .5200        | .0418        | .0202                 |
| Mn                   |   |       |       |        |        |        |        |        | 1      | -.3309 | .4925  | -.2193 | -.2647 | -.1539 | -.3197 | -.0107   | .1775    | -.5564   | -.5292 | .2774    | .0215  | .0198  | -.1246             | .0215        | -.0474       | .3925                 |
| Cu                   |   |       |       |        |        |        |        |        |        | 1      | .0329  | .6224  | .6676  | .6019  | .6826  | -.2999   | -.5087   | .5039    | .5435  | .1188    | .3869  | .2881  | .5051              | .3729        | .1584        | -.4835                |
| TEAC                 |   |       |       |        |        |        |        |        |        |        | 1      | .1333  | .0532  | .0866  | -.1146 | .1562    | -.4384   | -.2908   | -.1770 | .7214    | .1848  | .1333  | .0850              | .1772        | .0567        | .2313                 |
| DPPH                 |   |       |       |        |        |        |        |        |        |        |        | 1      | .9139  | .8183  | .7370  | -.4487   | -.6485   | .5107    | .5770  | .2492    | .8185  | .7169  | .8660              | .8116        | .1631        | -.4757                |
| FRAP                 |   |       |       |        |        |        |        |        |        |        |        |        | 1      | .8980  | .6744  | -.4682   | -.6336   | .5883    | .6427  | .1704    | .8576  | .7561  | .8934              | .8515        | .1817        | -.5033                |
| TPC                  |   |       |       |        |        |        |        |        |        |        |        |        |        | 1      | .6376  | -.4390   | -.6046   | .4264    | .4936  | .2884    | .7815  | .7000  | .7756              | .7783        | .1281        | -.3872                |
| TFC                  |   |       |       |        |        |        |        |        |        |        |        |        |        |        | 1      | -.4709   | -.3821   | .5130    | .5278  | -.0353   | .5365  | .4595  | .6239              | .5298        | .1086        | -.4959                |
| L*(D65)              |   |       |       |        |        |        |        |        |        |        |        |        |        |        |        | 1        | -.1732   | -.2412   | -.1808 | .4199    | -.5210 | -.3427 | -.5303             | -.4925       | -.3928       | .3898                 |
| a*(D65)              |   |       |       |        |        |        |        |        |        |        |        |        |        |        |        |          | 1        | -.5114   | -.6455 | -.6606   | -.5047 | -.4334 | -.5740             | -.4987       | -.1109       | .3529                 |
| b*(D65)              |   |       |       |        |        |        |        |        |        |        |        |        |        |        |        |          |          | 1        | .9864  | -.3058   | .3770  | .2263  | .5935              | .3518        | .3362        | -.7537                |
| C                    |   |       |       |        |        |        |        |        |        |        |        |        |        |        |        |          |          |          | 1      | -.1455   | .4305  | .2830  | .6363              | .4069        | .3201        | -.7374                |
| h(D65)               |   |       |       |        |        |        |        |        |        |        |        |        |        |        |        |          |          |          |        | 1        | .2065  | .2622  | .0971              | .2220        | -.1737       | .2678                 |
| Chl a                |   |       |       |        |        |        |        |        |        |        |        |        |        |        |        |          |          |          |        |          | 1      | .8941  | .9349              | .9955        | .1738        | -.3189                |
| Chl b                |   |       |       |        |        |        |        |        |        |        |        |        |        |        |        |          |          |          |        |          |        | 1      | .7525              | .9326        | -.2758       | .0091                 |
| Carot-enoids (x+c)   |   |       |       |        |        |        |        |        |        |        |        |        |        |        |        |          |          |          |        |          |        |        | 1                  | .9130        | .3526        | -.6167                |
| Chl a+ Chl b         |   |       |       |        |        |        |        |        |        |        |        |        |        |        |        |          |          |          |        |          |        |        |                    | 1            | .0816        | -.2551                |
| Chl a/ Chl b         |   |       |       |        |        |        |        |        |        |        |        |        |        |        |        |          |          |          |        |          |        |        |                    |              | 1            | -.7331                |
| (Chl a+Chl b)/ (x+c) |   |       |       |        |        |        |        |        |        |        |        |        |        |        |        |          |          |          |        |          |        |        |                    |              |              | 1                     |

**Table S7.** r-Pearson's coefficients for the correlation between variables for hydroponic samples (as an average over season). L\*—lightness, a\*, b\*—colour chromatic coordinates, h\*—hue angle, C\*—chroma.

[illegible]
